# Supplementary material for: Predictors of Staff Attitudes Toward Schizophrenia Treatments
Source: Atypon-hosted journal article supplement (doi:10.1176/appi.ps.201700257), 2017-12-01
Supplement: appi.ps.201700257.ds001.pdf [file appi.ps.201700257.ds001.pdf]

**Mental health professionals' views of schizophrenia (N=166)**

| Items                                                                                          | “Not true” |    | “Partially true” |    | “Completely true” |    |
|------------------------------------------------------------------------------------------------|------------|----|------------------|----|-------------------|----|
|                                                                                                | N          | %  | N                | %  | N                 | %  |
| <b>Views of people with schizophrenia and their families</b>                                   |            |    |                  |    |                   |    |
| People with schizophrenia can recover <sup>a</sup>                                             | 22         | 14 | 120              | 77 | 14                | 9  |
| People with schizophrenia are unpredictable <sup>a</sup>                                       | 18         | 11 | 116              | 74 | 22                | 14 |
| People with schizophrenia are dangerous <sup>a</sup>                                           | 36         | 22 | 121              | 74 | 6                 | 4  |
| People with schizophrenia are able to have a trusting relationship with the staff <sup>b</sup> | 10         | 6  | 92               | 57 | 59                | 37 |
| Families are resources for people with schizophrenia <sup>b</sup>                              | 7          | 5  | 69               | 46 | 74                | 49 |
| <b>Need for long-term medication</b>                                                           |            |    |                  |    |                   |    |
| People with schizophrenia must take drugs over the life <sup>a</sup>                           | 5          | 3  | 61               | 40 | 85                | 56 |
| If stop taking drugs, people with schizophrenia become dangerous <sup>a</sup>                  | 22         | 14 | 89               | 58 | 43                | 28 |
| If stop taking drugs, people with schizophrenia become unwell again <sup>a</sup>               | 1          | 1  | 58               | 38 | 94                | 61 |
| <b>Usefulness of psychosocial interventions</b>                                                |            |    |                  |    |                   |    |
| Rehabilitative interventions are useful in schizophrenia <sup>b</sup>                          | 2          | 1  | 59               | 36 | 101               | 62 |
| Psychoeducational family interventions are useful in schizophrenia <sup>b</sup>                | 6          | 4  | 42               | 26 | 111               | 70 |

<sup>a</sup> Item drawn from the Opinions on mental disorders Questionnaire – revised (5); <sup>b</sup> item specifically developed for this study. Need for long-term medication (3 items), subscale's Cronbach alpha=.70; Usefulness of psychosocial interventions (2 items), subscale's Cronbach alpha=. 83.

**Relationships of professionals' views about people with schizophrenia and their families with need for long-term medication and usefulness of psychosocial treatments**

| Items                                                                             | Need for long-term medication |       | Usefulness of psychosocial interventions |       |
|-----------------------------------------------------------------------------------|-------------------------------|-------|------------------------------------------|-------|
|                                                                                   | Spearman's r coefficient      | p     | Spearman's r coefficient                 | p     |
| People with schizophrenia can recover                                             | -.21                          | <.05  | .30                                      | <.001 |
| People with schizophrenia are unpredictable                                       | .36                           | <.001 | -.34                                     | <.001 |
| People with schizophrenia are dangerous                                           | .43                           | <.001 | -.34                                     | <.001 |
| People with schizophrenia are able to have a trusting relationship with the staff | -.44                          | <.001 | .28                                      | <.001 |
| Families are resources for people with schizophrenia                              | -.08                          | =.4   | .26                                      | <.001 |

**Acknowledgments** The authors thank Dr. Raffaella Tirri and Dr. Gilda Cinque, psychologists, for their contribution in the data collection.
